# Supplementary material for: Spontaneous Spiritual Awakenings: Phenomenology, Altered States, Individual Differences, and Well-Being
Source: PubMed Central journal article supplement (PMC8417526; doi:10.3389/fpsyg.2021.720579), 2021-08-19
Supplement: Table_1.pdf [file Table_1.pdf]

Supplementary data 1. Mean (M) and standard deviation (SD) scores for each of the 76 items of the Kundalini Awakening Scale (KAS; Sanches and Daniels, 2008).

| <b>Items</b>                                                                                                                                    | <b><i>M</i></b> | <b><i>SD</i></b> |
|-------------------------------------------------------------------------------------------------------------------------------------------------|-----------------|------------------|
| I heard sounds such as tones, music, hissing, thunder, drumming, or the sound of cymbals when no such sound was being produced outside my head. | 4.46            | 2.344            |
| I had telepathic experiences.                                                                                                                   | 5.51            | 1.841            |
| I saw people or objects that weren't materially present.                                                                                        | 4.76            | 2.246            |
| I experienced doing things that seemed to be controlled by another force or intelligence.                                                       | 5.07            | 2.059            |
| I experienced light inside my head.                                                                                                             | 5.54            | 2.003            |
| I saw auras around people or objects.                                                                                                           | 4.27            | 2.27             |
| I sensed unusual cold inside my body, or on my skin.                                                                                            | 3.68            | 2.274            |
| I experienced a spontaneous, involuntary positioning of my limbs.                                                                               | 3.78            | 2.354            |
| I experienced having odd breathing patterns at times.                                                                                           | 4.53            | 2.125            |
| I experienced an odd functioning of my excretory system without an apparent physical cause.                                                     | 3.65            | 2.231            |
| I experienced an odd functioning of my reproductive system.                                                                                     | 3.58            | 2.127            |
| I experienced an elevation of my consciousness.                                                                                                 | 6.67            | 0.968            |
| I heard sounds that didn't seem to be perceived by my ears and this had a positive connotation for me.                                          | 4.72            | 2.27             |

|                                                                                                                 |      |       |
|-----------------------------------------------------------------------------------------------------------------|------|-------|
| I experienced my breath temporarily become significantly faster.                                                | 4.2  | 1.985 |
| I experienced a shining halo emanating from my head.                                                            | 3.76 | 2.162 |
| I experienced a temporary incapability to read.                                                                 | 3.36 | 2.167 |
| I experienced feelings of some form of energy stored in the genital region.                                     | 4.9  | 2.048 |
| I felt that my mind started to function differently.                                                            | 6.61 | 0.855 |
| I experienced dreams of a prophetic nature.                                                                     | 5.44 | 1.9   |
| I experienced an expansion of my being.                                                                         | 6.53 | 1.061 |
| I heard sounds that didn't seem to be produced outside my head, and they made me feel comfortable and at peace. | 4.57 | 2.192 |
| I had experiences of elevation and bliss followed by phases of acute depression.                                | 4.78 | 2.19  |
| I had an experience of union with some divine force or energy.                                                  | 6.34 | 1.405 |
| I experienced my mind as an uncontrollable incessant flux of ideas or thoughts.                                 | 5.13 | 1.991 |
| I feared for my mental sanity.                                                                                  | 4.12 | 2.411 |
| I feel that my mind has developed a more effective mode of functioning since my experience.                     | 6.11 | 1.132 |
| While meditating I felt carried outside my body.                                                                | 4.86 | 2.01  |
| I experienced a light which seemed to be associated with my thoughts.                                           | 4.45 | 2.055 |

|                                                                                                                     |      |       |
|---------------------------------------------------------------------------------------------------------------------|------|-------|
| I experienced an odd functioning of my digestive system without any apparent physical cause.                        | 3.83 | 1.986 |
| I experienced a temporary incapability to control my mind.                                                          | 4.36 | 2.041 |
| I had experiences of elevation and bliss.                                                                           | 6.47 | 1.162 |
| I've felt more connected with people since my experience.                                                           | 5.86 | 1.456 |
| I feel that I have developed a new channel of communication within me, since my experience.                         | 6.27 | 1.255 |
| I experienced a temporary incapability to control my body.                                                          | 4.3  | 2.166 |
| I experienced seeing people or objects that weren't materially present and this made me feel scared and frightened. | 3.07 | 2.1   |
| I experienced a halo in my head which increased after a spell of prolonged concentration.                           | 3.45 | 2.115 |
| My consciousness suddenly became wider than it used to be.                                                          | 6.09 | 1.453 |
| My consciousness gradually became wider than it used to be.                                                         | 5.2  | 1.875 |
| While meditating I felt immersed in a reality outside space.                                                        | 5.38 | 1.737 |
| I had sensations of tickling, itching or crawling that moved around in a patterned manner.                          | 4.14 | 2.255 |
| Agreeable sounds, like music, have become even more pleasurable to me since my experience.                          | 5.65 | 1.549 |
| Experiencing light inside my head was a pleasant experience for me.                                                 | 5.36 | 1.618 |
| I felt that when I woke up my personality descended from a higher realm to a lower one.                             | 4.22 | 2.05  |

|                                                                                              |      |       |
|----------------------------------------------------------------------------------------------|------|-------|
| Seeing lights that didn't seem to be perceived by my eyes was a pleasant experience for me.  | 5.18 | 1.739 |
| I experienced an unusual cold in my body moving from place to place.                         | 3.22 | 1.97  |
| I perceived an aura around my body that stretched itself when I meditated/contemplated.      | 4.47 | 2.119 |
| While meditating I felt immersed in a reality outside time.                                  | 5.74 | 1.621 |
| I felt a spiritual ecstasy that could be compared with the bliss of the sexual union.        | 5.7  | 1.726 |
| I've become more sensitive to artistic forms of expression since my experience.              | 5.95 | 1.453 |
| I experienced the spontaneous involuntary positioning of my fingers.                         | 3.89 | 2.141 |
| I've become aware of an increase in the area of my peripheral awareness since my experience. | 5.66 | 1.562 |
| I felt very depressed.                                                                       | 3.54 | 2.313 |
| My everyday consciousness has become slightly elevated since my experience.                  | 6.1  | 1.385 |
| I experienced an unusual heat in a specific part of my body.                                 | 4.75 | 2.157 |
| I experienced my dreams as filled with light.                                                | 4.11 | 1.839 |
| I had spells of intense absorption without being able to resist them.                        | 5.06 | 1.857 |
| I had out of body experiences.                                                               | 4.99 | 2.015 |
| I feel that my imagination became highly excitable.                                          | 5.61 | 1.625 |

|                                                                                                              |      |       |
|--------------------------------------------------------------------------------------------------------------|------|-------|
| I became aware of a blissful sensation coming from the spine where it was concentrated.                      | 4.93 | 1.989 |
| I saw lights that didn't seem to be perceived by my eyes.                                                    | 5.14 | 2.075 |
| My consciousness has become wider than it was before my experience.                                          | 6.47 | 1.073 |
| I felt a blissful sensation in all my nerves.                                                                | 5.65 | 1.775 |
| I'm aware of some deep changes in my personality since my experience.                                        | 6.45 | 1.072 |
| When I'm under some intense spells of absorption I feel that my whole personality is expanded.               | 5.41 | 1.715 |
| I felt in touch with something measureless.                                                                  | 6.57 | 0.896 |
| I saw people or objects that weren't materially present and that have made me feel comfortable and at peace. | 4.68 | 2.076 |
| I experienced smooth involuntary body movements.                                                             | 4.36 | 2.161 |
| I experienced a new form of activity in my sexual organs.                                                    | 4.35 | 2.05  |
| I felt in touch with something that was nothing and yet was everything.                                      | 6.1  | 1.508 |
| I feel that my imagination has become very vivid since my experience.                                        | 5.53 | 1.5   |
| I've felt humbled by the contact with a transcendent reality.                                                | 6.36 | 1.133 |
| I experienced a feeling of detachment from the world.                                                        | 5.7  | 1.768 |
| My sense of touch became more sensitive than it was before my experience.                                    | 5.11 | 1.835 |

|                                                                                                               |      |       |
|---------------------------------------------------------------------------------------------------------------|------|-------|
| I experienced an unusual cold only in a specific part of my body.                                             | 3.14 | 1.834 |
| I feel that my emotions have magnified since my experience.                                                   | 5.36 | 1.697 |
| My experience has made me aware of a more solid reality that makes the rest appear shadowy and unsubstantial. | 5.1  | 1.722 |
