# Supplementary material for: Spontaneous Spiritual Awakenings: Phenomenology, Altered States, Individual Differences, and Well-Being
Source: PubMed Central journal article supplement (PMC8417526; doi:10.3389/fpsyg.2021.720579), 2021-08-19
Supplement: Table_2.pdf [file Table_2.pdf]

Supplementary data 2. Mean (M) and standard deviation (SD) scores for each of the 30 items of the Mystical Experience Questionnaire (MEQ30; Maclean et al., 2012).

| <b>Items</b>                                                                                                                                            | <b><i>M</i></b> | <b><i>SD</i></b> |
|---------------------------------------------------------------------------------------------------------------------------------------------------------|-----------------|------------------|
| Loss of your usual sense of time.                                                                                                                       | 3.44            | 1.459            |
| Experience of amazement.                                                                                                                                | 4.37            | 0.866            |
| Sense that the experience cannot be described adequately in words.                                                                                      | 4.34            | 1.017            |
| Gain of insightful knowledge experienced at an intuitive level.                                                                                         | 4.48            | 0.789            |
| Feeling that you experienced eternity or infinity.                                                                                                      | 3.92            | 1.407            |
| Experience of oneness or unity with objects and/or persons perceived in your surroundings.                                                              | 3.86            | 1.467            |
| Loss of your usual sense of space.                                                                                                                      | 3.34            | 1.565            |
| Feelings of tenderness and gentleness.                                                                                                                  | 3.97            | 1.165            |
| Certainty of encounter with ultimate reality (in the sense of being able to “know” and “see” what is really real at some point during your experience). | 4.18            | 1.122            |
| Feeling that you could not do justice to your experience by describing it in words.                                                                     | 4.29            | 1.172            |
| Loss of usual awareness of where you were.                                                                                                              | 2.76            | 1.721            |
| Feelings of peace and tranquility.                                                                                                                      | 4.07            | 1.16             |
| Sense of being “outside of” time, beyond past and future.                                                                                               | 3.76            | 1.594            |
| Freedom from the limitations of your personal self and feeling a unity or bond with what was felt to be greater than your personal self.                | 4.04            | 1.184            |
| Sense of being at a spiritual height.                                                                                                                   | 4.03            | 1.337            |

|                                                                                                                                                                 |      |       |
|-----------------------------------------------------------------------------------------------------------------------------------------------------------------|------|-------|
| Experience of pure being and pure awareness (beyond the world of sense impressions).                                                                            | 4.14 | 1.142 |
| Experience of ecstasy.                                                                                                                                          | 4.01 | 1.284 |
| Experience of the insight that “all is One”.                                                                                                                    | 4.13 | 1.288 |
| Being in a realm with no space boundaries.                                                                                                                      | 3.57 | 1.65  |
| Experience of oneness in relation to an “inner world” within.                                                                                                   | 3.85 | 1.394 |
| Sense of reverence.                                                                                                                                             | 4.03 | 1.297 |
| Experience of timelessness.                                                                                                                                     | 3.8  | 1.349 |
| You are convinced now, as you look back on your experience, that in it you encountered ultimate reality (i.e., that you “knew” and “saw” what was really real). | 4.07 | 1.149 |
| Feeling that you experienced something profoundly sacred and holy.                                                                                              | 4.38 | 1.109 |
| Awareness of the life or living presence in all things.                                                                                                         | 4.33 | 1.132 |
| Experience of the fusion of your personal self into a larger whole.                                                                                             | 4.01 | 1.374 |
| Sense of awe or awesomeness.                                                                                                                                    | 4.47 | 1.023 |
| Experience of unity with ultimate reality.                                                                                                                      | 4.08 | 1.23  |
| Feeling that it would be difficult to communicate your own experience to others who have not had similar experiences.                                           | 4.24 | 1.063 |
| Feelings of joy.                                                                                                                                                | 4.14 | 1.213 |
